# Supplementary material for: Weak Ultrasound Contributes to Neuromodulatory Effects in the Rat Motor Cortex
Source: MDPI journal article supplement (doi:10.3390/ijms24032578), 2023-01-30
Supplement: s1 [file s1]

## Supplementary Figure

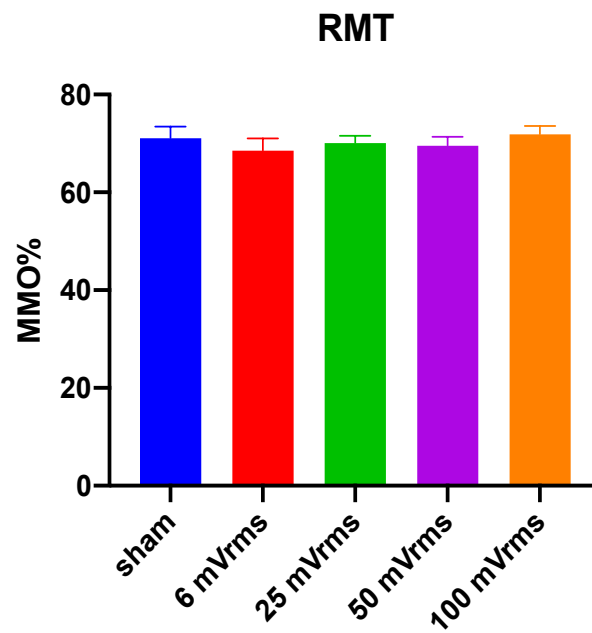

**Supplementary Figure S1.** Resting motor threshold (RMT) in each group. Data are presented as the mean  $\pm$  standard error of the mean ( $n = 15$  per group).

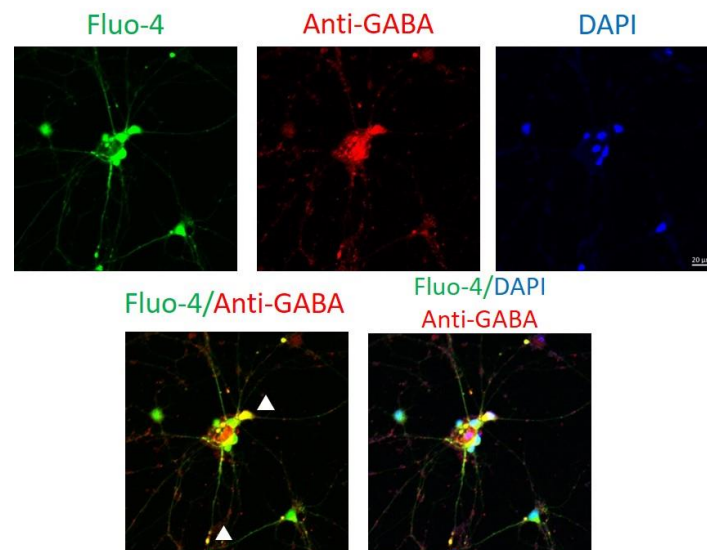

**Supplementary Figure S2.** Representative images of Fluo-4 and anti-GABA immunostaining of rodent primary cortical neurons at DIV 12 after weak ultrasound stimulation. Weak ultrasound stimulation-activated neurons were stained with Fluo-4 (green). The activated neurons were partially co-immunostained with anti-GABA.
